# Supplementary material
Source: PubMed Central journal article supplement (PMC6781260)
Supplement: Supp_Data.pdf [file Supp_Data.pdf]

## Supplementary Data

### Dual Hybridization ELISA

To liquify the CF sputum samples, samples were thawed on ice and 1×sputum liquifier (Dalynn Biologicals) was added in a 1:1 (v/v) ratio. After a 15-minute incubation at 37°C, a serial dilution using phosphate-buffered saline (PBS) was made in duplicate for every sample. A standard curve of eluforsen in PBS was prepared as well.

A volume of 40  $\mu\text{L}$  10% sodium dodecyl sulfate (SDS) (Sigma Aldrich) was pipetted to all wells of a 96-well polymerase chain reaction (PCR) plate (Greiner), followed by adding 40  $\mu\text{L}$  of the standard curve or sample dilutions in duplicate. A standard curve (duplicate) and a blank sample (duplicate) as negative control were also prepared for each plate. Next, 160  $\mu\text{L}$  of a capture and detection probe (Midland) in 6×SSPE mixture was added to each well, and plates were sealed (Axygen Scientific, Inc.) and placed in a thermocycler. A program consisting of a 5-minute cycle at 80°C followed by a 1-hour cycle at 42°C was followed to allow sample and probe hybridization.

Next, a NeutrAvidin-coated 96-well plate (Pierce) was washed once with wash buffer (50 nM Trizma-HCl, 0.6M NaCl, 0.2% Tween-20). Afterward, the plate was tapped on paper towel to remove access wash buffer. After completing the thermocycler program, a volume of 100  $\mu\text{L}$  per sample was pipetted from the PCR plate into the NeutrAvidin plate. The NeutrAvidin plate was then closed with a plate sealer and incubated at room temperature (RT) for 1 hour on an orbital plate shaker to allow the hybridized sample to attach to the plate.

Next, the NeutrAvidin plate was washed twice with wash buffer, and a volume of 100  $\mu\text{L}$  of anti-digoxigenin-AP (Abcam) working solution was added to each well. The plate was covered with a plate sealer and incubated at room temperature for 30 minutes on an orbital plate shaker. After the anti-digoxigenin-AP incubation was complete, the plate was washed twice with wash buffer, and 100  $\mu\text{L}$  of AttoPhos<sup>®</sup> (Promega) working solution was added to each well. The plate was incubated in the dark at RT for 30 minutes, and 50  $\mu\text{L}$  of 20% ethylenediamine tetraacetic acid (EDTA) (Sigma Aldrich) stop solution was added to every well. The wells were analyzed by a Wallac Victor2 plate reader.

### Hybridization High-Performance Liquid Chromatography (HPLC)

Frozen organs were crushed using a mortar, and a weight of 40–60 mg of powder per tissue was placed in a 1.5 mL eppendorf vial. Subsequently, tissue samples were stored at –80°C on dry ice before further use. A volume of 1 mL lysis solution was added to each tissue sample, and samples were treated with an ultrasonic stick until the mixture appeared homogenous, or for a maximum of 1 minute. For serum samples, the lysis solution was added in a 1:3 (v/v) ratio to thawed samples and was subsequently mixed. Subsequently,

tissue and serum lysis samples were incubated for 30 minutes at 65°C to allow lysis to take place.

In a new PCR plate, 100  $\mu\text{L}$  of the hybridization master mix was added to each well. Also, the required volume of the lysis solution was added (volume dependent on expected eluforsen concentration). Water was added to a final volume of 200  $\mu\text{L}$ . Subsequently, the plate was sealed and centrifuged for 1 minute at 4000 rpm, after which it was incubated at 95°C for 15 minutes. After incubation, the plate was placed on ice for 5 minutes followed by 1-minute centrifuging at 4000 rpm and placing it into an high-performance liquid chromatography (HPLC) autosampler. Samples were analyzed with a Dionex HPLC-System Ultimate 3000 consisting of a Shimadzu Fluorescence Detector 20AxS, Ultimate pump DGP-3600A, Ultimate column heater TCC-3100 using a DNA-Pac PA200 column, precolumn-filter holder, and peek frit UHMW 2  $\mu\text{m}$ . A flow rate of 1 mL/min and eluent buffers A (25 mM Tris-buffer pH 8.0, 30% acetonitrile, 1.5 M urea, and 1 mM EDTA), B (800 mM NaClO<sub>4</sub> in A), and C (2.5 M NaClO<sub>4</sub> in A) were used. The detection was performed at an excitation @ 436 nm and emission @ 484 nm. For all samples, an injection of 100  $\mu\text{L}$  volume was used.

### Ion-Pairing Reversed-Phase HPLC

Sample preparation was performed by diluting the samples down to ~0.2 mg/mL with mobile phase A, which consisted of 100 mM HFIP and 15 mM HEA. A volume of 10  $\mu\text{L}$  of the diluted sample was injected into an HPLC-System Ultimate 3000 RS consisting of Ultimate 3000 RS LPG-Pump, Ultimate 3000 RS Autosampler, Ultimate 3000 RS Column Compartment, and Ultimate 3000 RS Variable Wavelength Detector with a Waters Acuity UPLC BEH130 C18 column. A flow rate of 250  $\mu\text{L}/\text{min}$  and mobile phases A and B (100 mM HFIP, 15 mM HEA, and 80% MeOH) were used. Detection was performed at 260/280 nm. This method is stability indicating, allowing the (quantitative) detection of impurities and breakdown products.

### Ion Exchange-High Performance Liquid Chromatography (IEX-HPLC)

Samples were pretreated with proteinase K before IEX-HPLC analysis. A sample volume of 20  $\mu\text{L}$  was injected into an HPLC-System Ultimate 3000 consisting of Ultimate Pump DGP-3600, Ultimate Autosampler WPS-3000SD Analytical, Ultimate Column Heater TCC-3000SD, and Ultimate UV Detector MWD-3000 with a DNAPac PA-200RS column. A flow rate of 1.5 mL/min and mobile phases A [25 mM TRIS/HCl (pH 8), 1 mM EDTA, and 25% can] and B [25 mM TRIS/HCl (pH 8), 1 mM EDTA, 1500 mM LiBr, and 25% can] were used. Detection was performed at 260/280 nm. This method is stability indicating, allowing the (quantitative) detection of impurities and breakdown products.
